# Supplementary material for: Dye-sensitized Pt@TiO2 core–shell nanostructures for the efficient photocatalytic generation of hydrogen
Source: PubMed Central journal article supplement (PMC3999845; doi:10.3762/bjnano.5.41), 2014-03-26
Supplement: Beilstein_J_Nanotechnol-05-360-s001.pdf [file Beilstein_J_Nanotechnol-05-360-s001.pdf]

## Supporting Information

for

### **Dye-sensitized Pt@TiO<sub>2</sub> core–shell nanostructures for the efficient photocatalytic generation of hydrogen**

Jun Fang<sup>1</sup>, Lisha Yin<sup>1</sup>, Shaowen Cao<sup>1</sup>, Yusen Liao<sup>1</sup> and Can Xue<sup>1,\*</sup>

Address: <sup>1</sup>Solar Fuels Laboratory, School of Materials Science and Engineering,  
Nanyang Technological University, 50 Nanyang Avenue, Singapore 639798,  
Singapore

Email: Can Xue - cxue@ntu.edu.sg

\* Corresponding author

### **Additional experimental data**

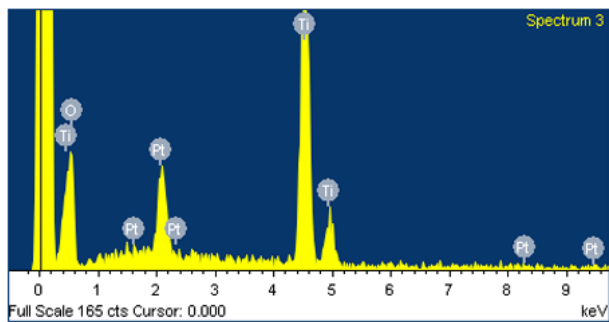

**Figure S1:** EDX spectrum of Pt@TiO<sub>2</sub> nanoparticles. The quantitative analysis shows that the molar ratio Pt/TiO<sub>2</sub> is 6.7%, which is quite close to the standard value of 5%.

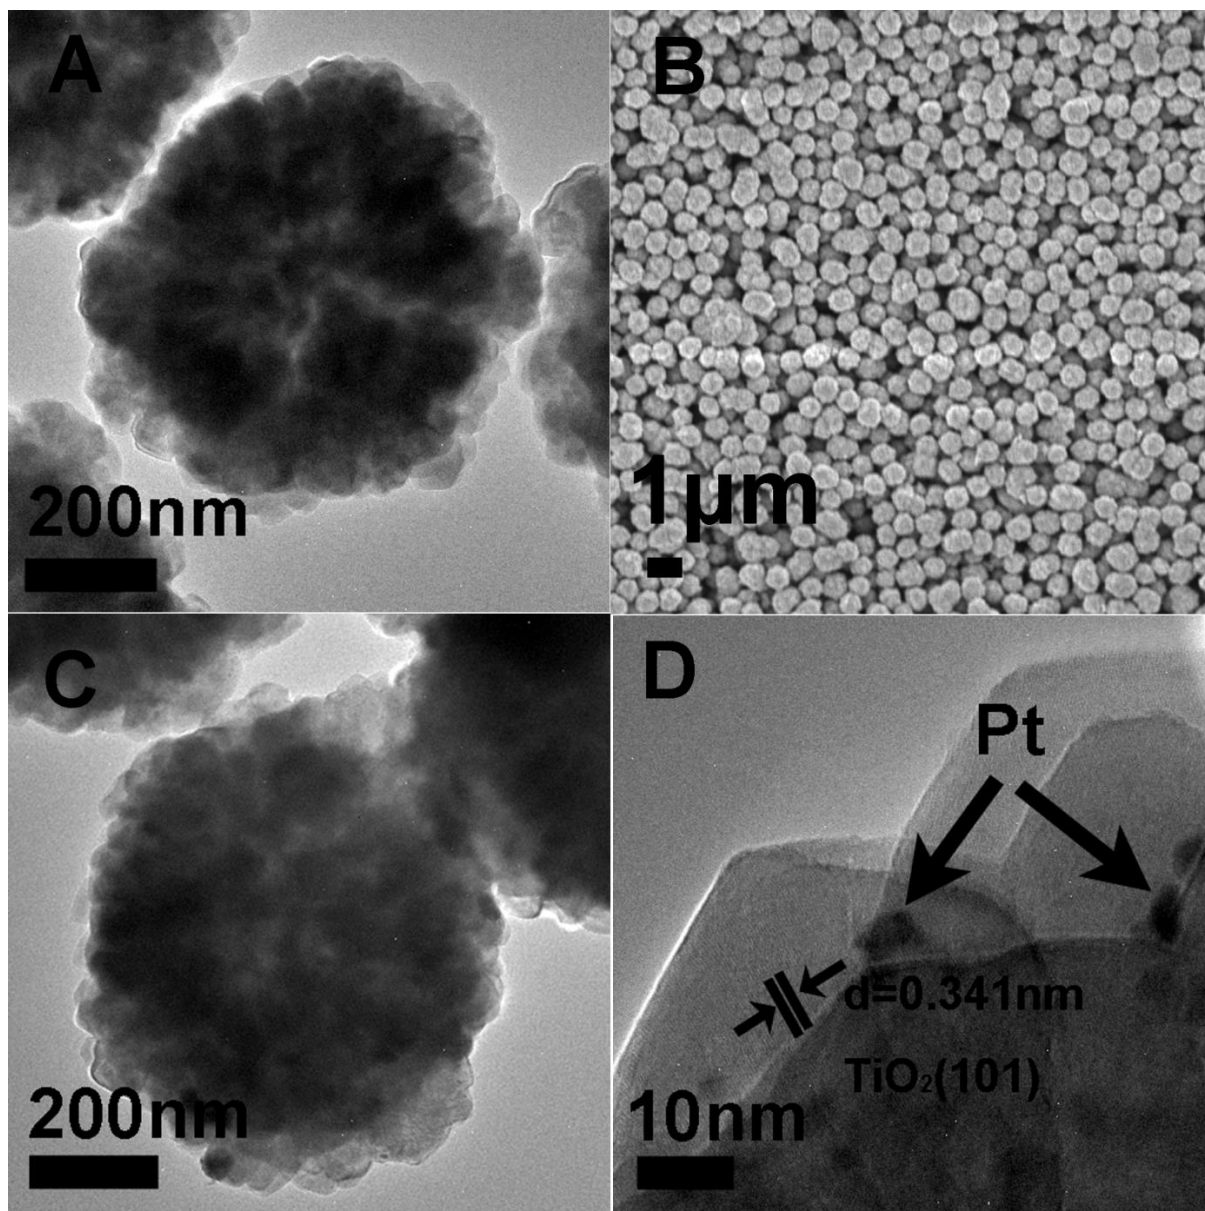

**Figure S2:** The TEM and SEM images of the Pt/TiO<sub>2</sub> photocatalyst. (A) TEM image of bare TiO<sub>2</sub>, (B) SEM image of Pt/TiO<sub>2</sub>, (C) TEM image of Pt/TiO<sub>2</sub>, (D) HRTEM image of Pt/TiO<sub>2</sub>.

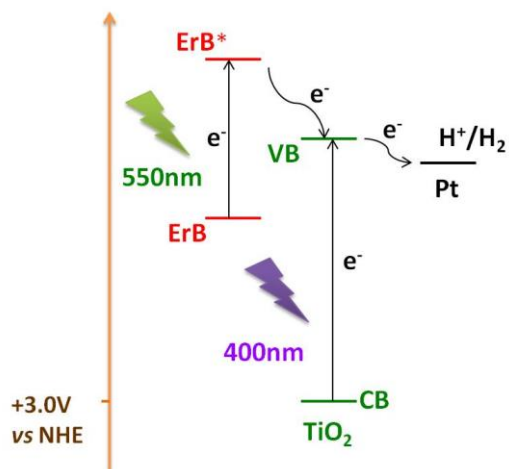

**Figure S3:** Energy diagram of ErB-sensitized Pt@TiO<sub>2</sub> for the generation of H<sub>2</sub> from proton reduction.

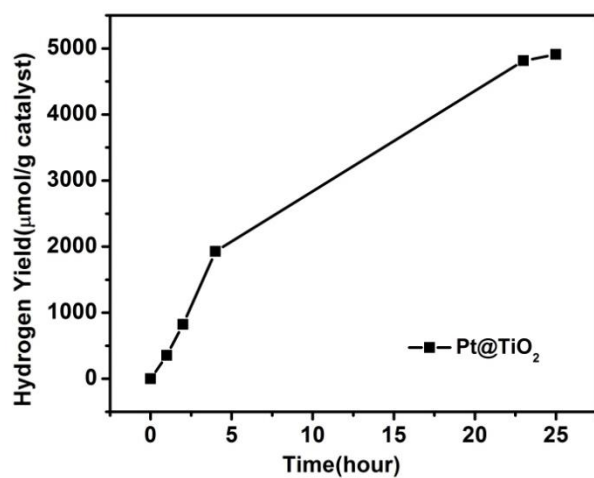

**Figure S4:** Long term test of H<sub>2</sub> evolution by ErB-Pt@TiO<sub>2</sub> under irradiation at 550 ± 20 nm.
